# Supplementary material for: Applications of Blocker Nucleic Acids and Non-Metazoan PCR Improves the Discovery of the Eukaryotic Microbiome in Ticks
Source: MDPI journal article supplement (doi:10.3390/microorganisms9051051), 2021-05-13
Supplement: s1 [file s1]

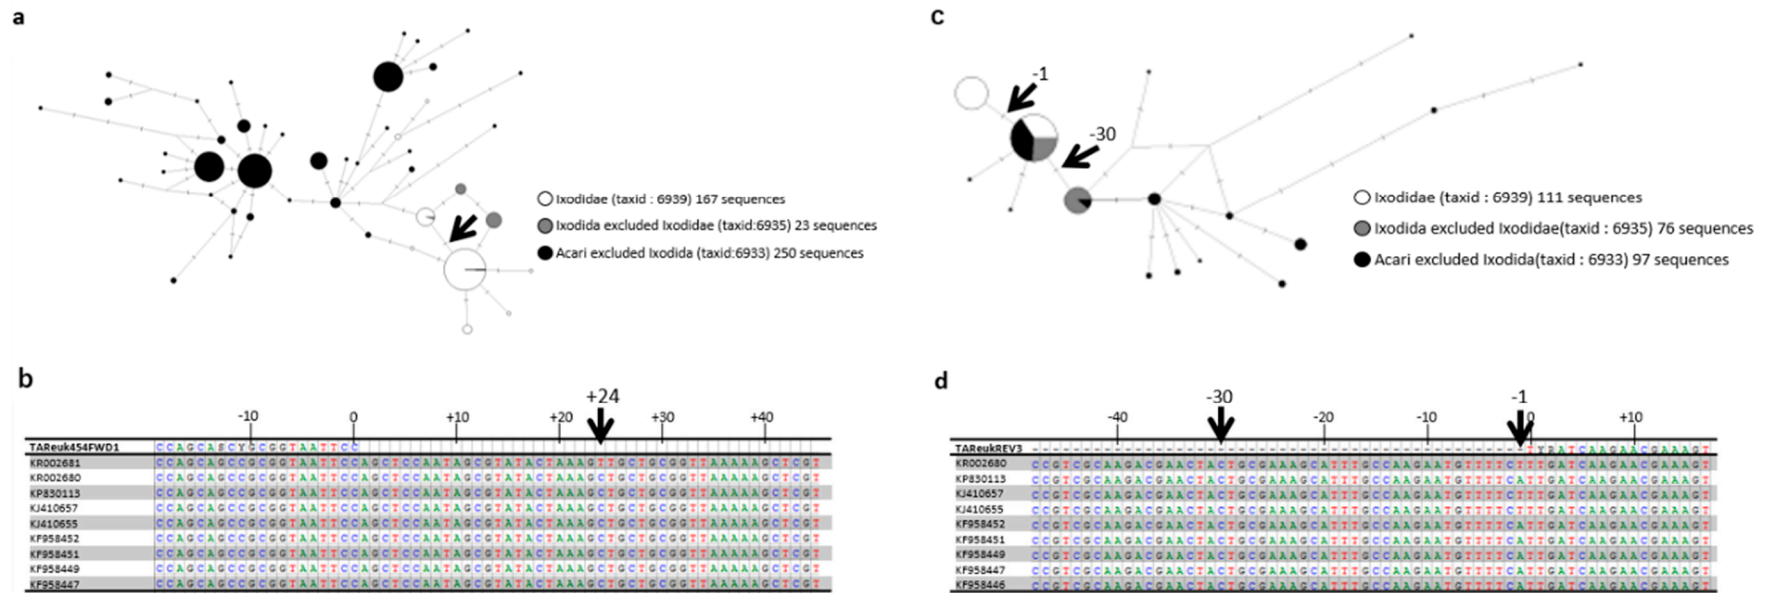

**Figure S1.** Median-joining network analysis for blocker designing. a) Median-joining network diagram of the TAREuk454FWD1 priming region at positions between 40 bp downstream and 1 bp upstream of the 3' end of the primer. The arrow indicates a single nucleotide mismatch at 24 bp downstream of the 3' end of the primer. b) Alignment of TAREuk454FWD1 and 18S rDNA sequences of the representative tick species. The left column in the table shows the primer ID or sequence accession number. The numbers at the top indicate the relative nucleotide position from the 3' end of the primer. c) Median-joining network diagram of the TAREukREV3 priming region at positions between 40 bp upstream and 1 bp downstream of the primer. The arrows indicate single nucleotide mismatch at 1 or 30 bp upstream of the primer. d) Alignment of TAREukREV3 and 18S rDNA sequences of the representative tick species. The left column in the table shows the primer ID or sequence accession number. The numbers at the top indicate the relative nucleotide positions from the 3' end of the primer.

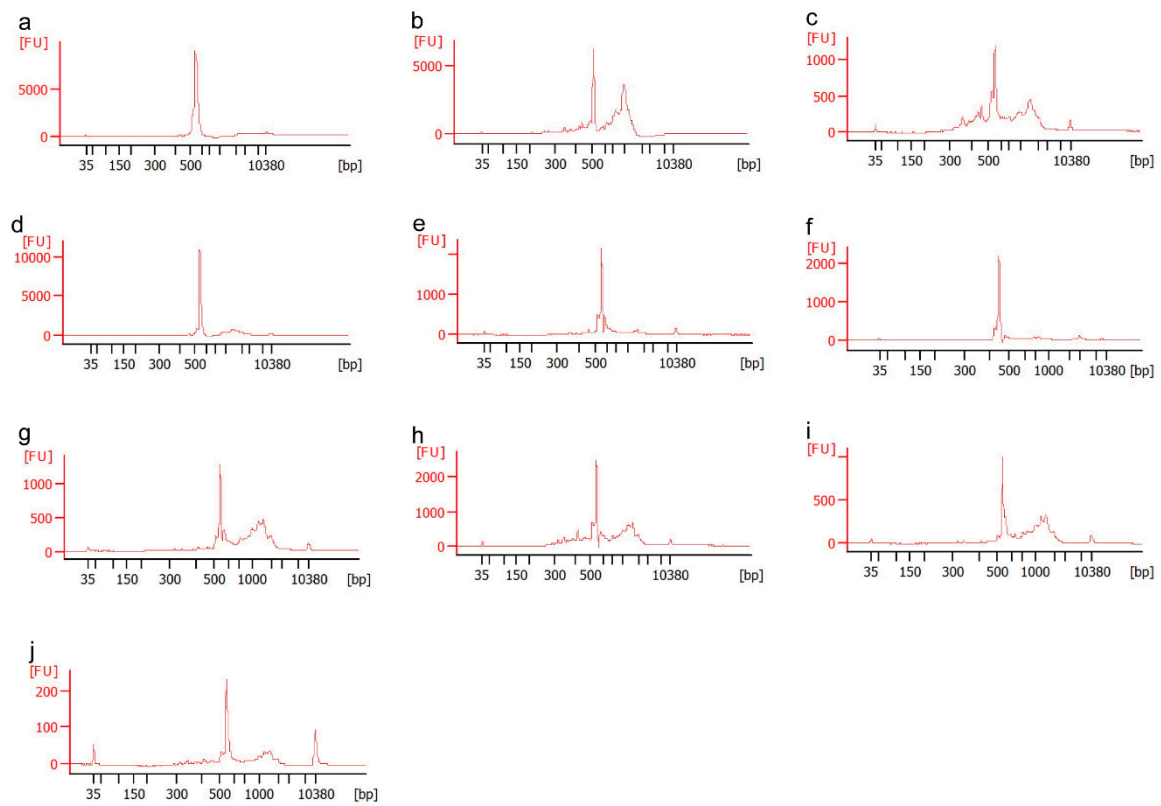

**Figure S2.** The fragment size distribution of the amplicon libraries using different PCR and purification methods. Amplicon libraries were prepared using *Ixodes persulcatus* DNA (tick ID: 933) (a-e) or *Amblyomma testudinarium* DNA (tick ID: 2874) (f-j). PCR and purification methods were either control with AMPure (a and f), TickB\_PNA with AMPure (b and g), TickB\_PNA with SizeSelect (c and h), TickB\_LNA with AMPure (d and i), or TickB\_LNA with SizeSelect (e and j).

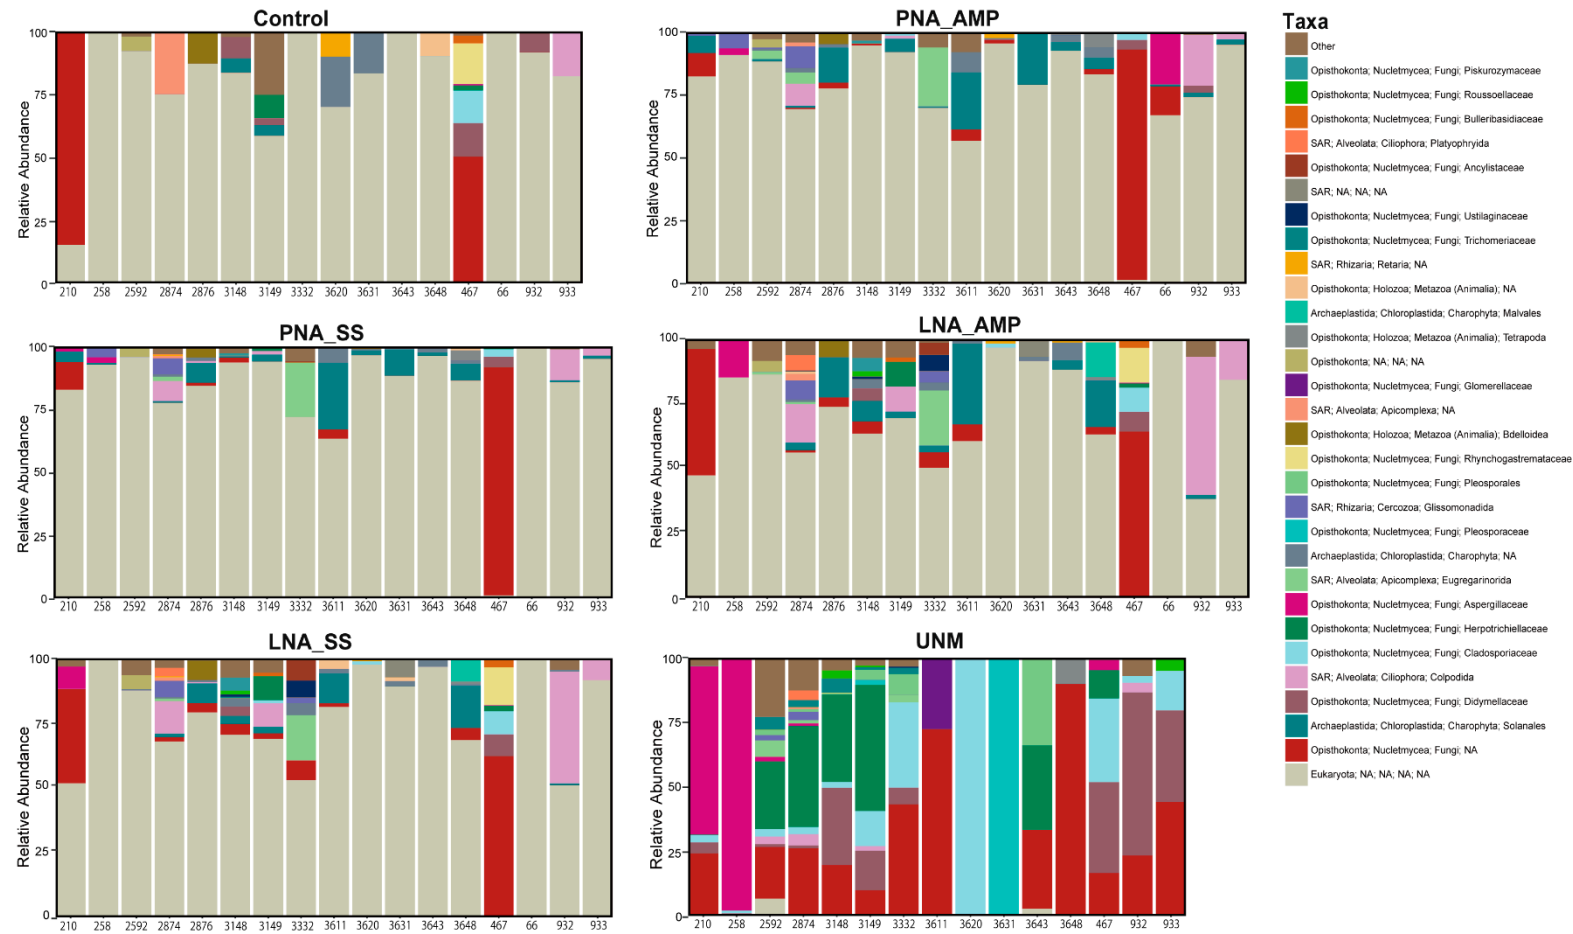

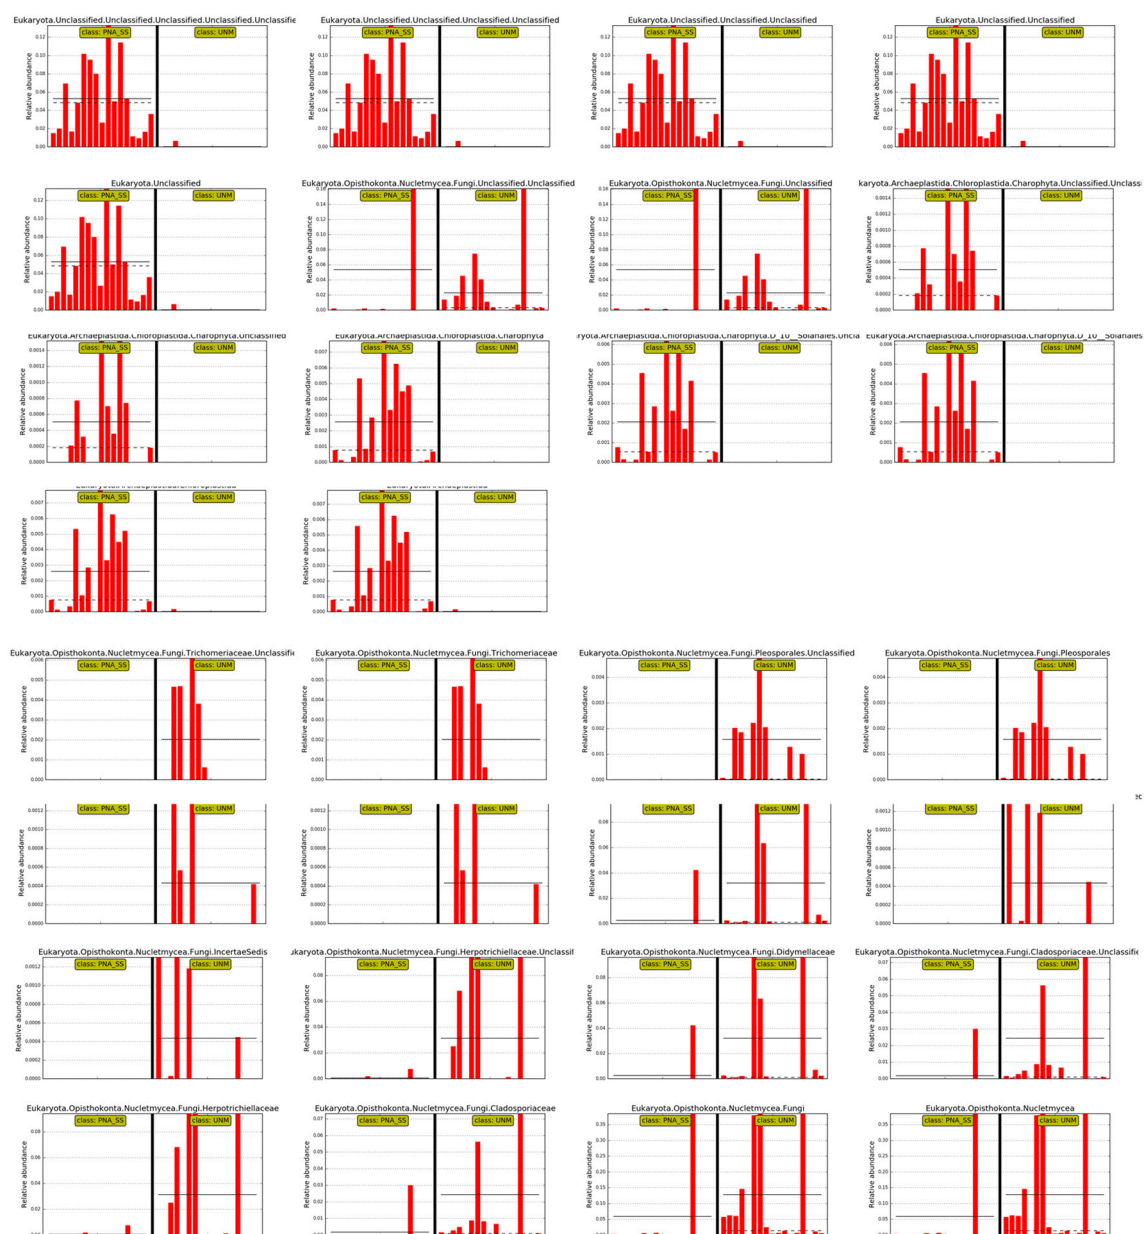

**Figure S4.** Significantly differential features between TickB\_PNA and UNonMet-PCR based on LefSe analysis. Each graph indicates the differential features. The histogram indicates the relative abundance of each samples.

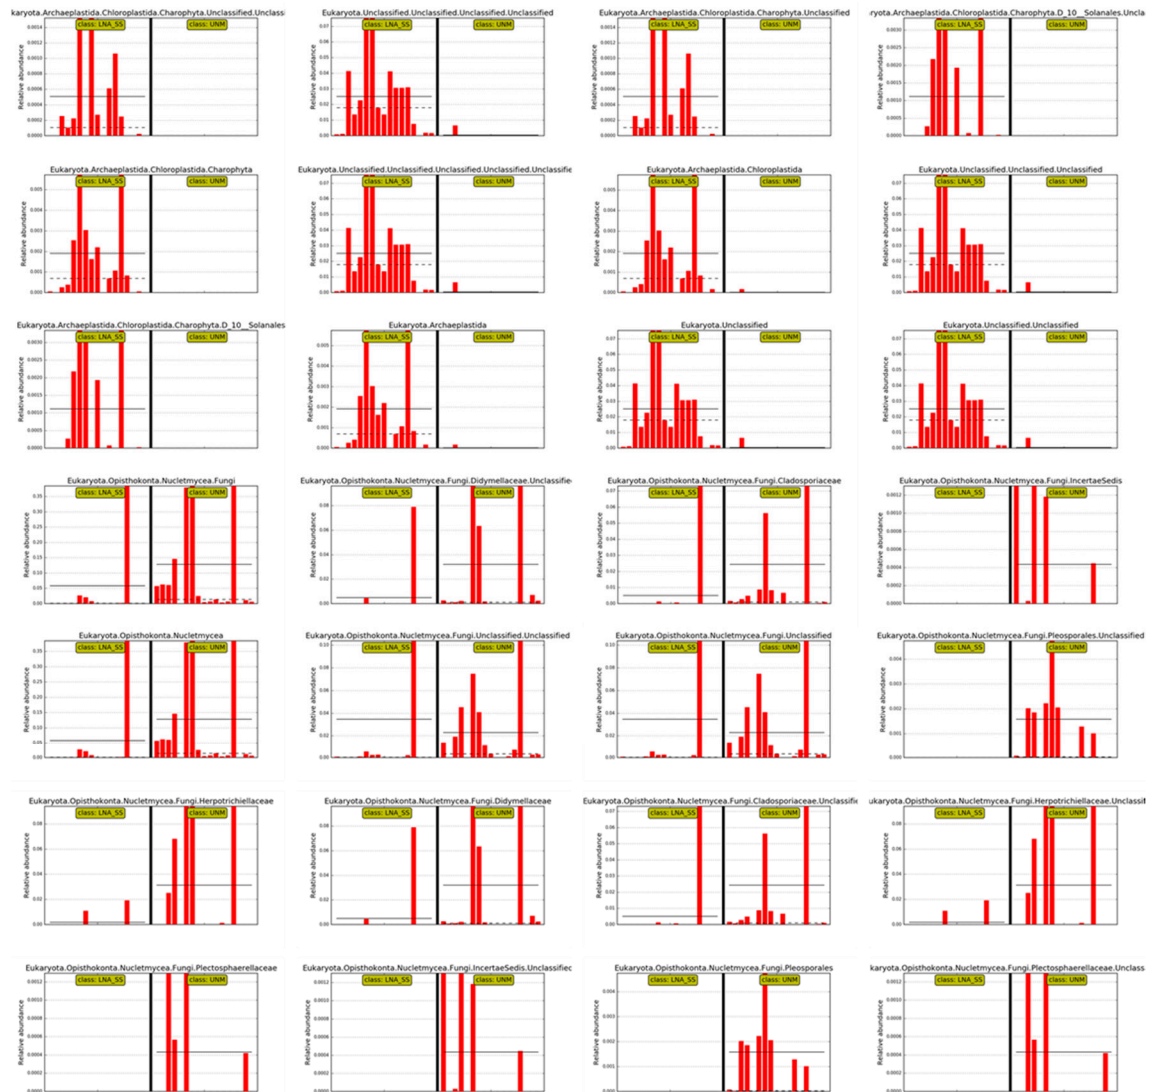

**Figure S5.** Significantly differential features between TickB\_LNA and UNonMet-PCR based on LefSe analysis. Each graph indicates the differential features. The histogram indicates the relative abundance of each samples.

**Table S2.** The proportion of the non-tick reads and non-tick read enrichment value.

| Tick ID | Proportion of non-tick reads |         |        |         |        |        | Non-tick read enrichment values* |        |         |        |       |
|---------|------------------------------|---------|--------|---------|--------|--------|----------------------------------|--------|---------|--------|-------|
|         | Control                      | PNA_AMP | PNA_SS | LNA_AMP | LNA_SS | UNM    | PNA_AMP                          | PNA_SS | LNA_AMP | LNA_SS | UNM   |
| 66      | 0.01%                        | 0.75%   | 0.95%  | 0.01%   | 0.02%  | 0.00%  | 133.6                            | 169.2  | 1.5     | 3.2    | 0.0   |
| 210     | 0.01%                        | 1.57%   | 1.82%  | 0.09%   | 0.16%  | 5.74%  | 129.0                            | 149.2  | 7.0     | 13.0   | 470.4 |
| 258     | 0.02%                        | 1.52%   | 2.15%  | 0.09%   | 0.12%  | 6.23%  | 62.6                             | 88.8   | 3.6     | 4.8    | 257.0 |
| 467     | 81.14%                       | 99.14%  | 99.85% | 94.39%  | 93.35% | 99.56% | 1.2                              | 1.2    | 1.2     | 1.2    | 1.2   |
| 932     | 0.02%                        | 1.01%   | 1.91%  | 0.25%   | 0.38%  | 1.11%  | 50.9                             | 96.2   | 12.6    | 18.9   | 56.2  |
| 933     | 0.04%                        | 1.56%   | 3.78%  | 0.13%   | 0.19%  | 0.63%  | 44.0                             | 106.8  | 3.7     | 5.3    | 17.8  |
| 2592    | 0.21%                        | 3.65%   | 7.22%  | 2.95%   | 4.72%  | 9.57%  | 17.4                             | 34.5   | 14.1    | 22.6   | 45.8  |
| 2874    | 0.02%                        | 1.49%   | 2.17%  | 1.32%   | 1.99%  | 17.44% | 72.1                             | 105.0  | 64.0    | 96.3   | 844.7 |
| 2876    | 0.06%                        | 3.24%   | 5.75%  | 1.29%   | 2.83%  | 0.00%  | 58.0                             | 102.7  | 23.0    | 50.6   | 0.0   |
| 3148    | 0.31%                        | 5.41%   | 10.53% | 8.64%   | 12.78% | 37.90% | 17.7                             | 34.4   | 28.2    | 41.7   | 123.7 |
| 3149    | 0.49%                        | 6.25%   | 10.14% | 7.96%   | 11.71% | 41.23% | 12.8                             | 20.8   | 16.3    | 24.0   | 84.6  |
| 3332    | 0.02%                        | 8.59%   | 11.13% | 2.36%   | 3.39%  | 2.52%  | 543.6                            | 705.0  | 149.5   | 214.5  | 159.6 |
| 3611**  | 0.00%                        | 2.70%   | 4.18%  | 0.62%   | 1.67%  | 0.45%  | -                                | -      | -       | -      | -     |
| 3620    | 0.03%                        | 9.96%   | 13.75% | 2.39%   | 4.21%  | 0.67%  | 309.2                            | 427.0  | 74.2    | 130.8  | 20.8  |
| 3631    | 0.06%                        | 2.99%   | 5.63%  | 1.84%   | 3.43%  | 1.37%  | 46.7                             | 87.9   | 28.7    | 53.5   | 21.4  |
| 3643    | 0.03%                        | 7.70%   | 11.87% | 1.53%   | 3.18%  | 0.38%  | 230.4                            | 355.0  | 45.7    | 95.0   | 11.3  |
| 3648    | 0.03%                        | 3.96%   | 6.09%  | 3.36%   | 4.53%  | 0.78%  | 125.8                            | 193.7  | 106.9   | 144.0  | 24.7  |
| Median  | 0.03%                        | 3.24%   | 5.75%  | 1.53%   | 3.18%  | 1.37%  | 60.3                             | 103.8  | 19.6    | 32.9   | 35.2  |
| Average | 4.85%                        | 9.50%   | 11.70% | 7.60%   | 8.74%  | 13.27% | 115.9                            | 167.3  | 36.3    | 57.5   | 133.7 |
| Max     | 81.14%                       | 99.14%  | 99.85% | 94.39%  | 93.35% | 99.56% | 543.6                            | 705.0  | 149.5   | 214.5  | 844.7 |
| Min     | 0.00%                        | 0.75%   | 0.95%  | 0.01%   | 0.02%  | 0.00%  | 1.2                              | 1.2    | 1.2     | 1.2    | 0.0   |

Proportion of non-tick reads = non-tick reads / eukaryotic reads

\*Non-tick read enrichment values = proportion of non-tick reads (each method) / proportion of non-tick reads (control)

\*\*Non-tick read enrichment value was not calculated for tick ID 3611 because there was no non-tick reads in the control.

**Table S3.** Significance of Shannon Diversity.

| <b>Contrast</b>          | <b>Estimate</b> | <b>Standard<br/>Error</b> | <b>t-value</b> | <b>p-value</b> |
|--------------------------|-----------------|---------------------------|----------------|----------------|
| <b>control - LNA_AMP</b> | -0.4728         | 0.163221                  | -2.8967        | 0.052233       |
| <b>control - LNA_SS</b>  | -0.75577        | 0.163221                  | -4.63037       | 0.000178       |
| <b>control - PNA_AMP</b> | -0.96824        | 0.163221                  | -5.93205       | 8.54E-07       |
| <b>control - PNA_SS</b>  | -1.16467        | 0.163221                  | -7.13555       | 4.23E-09       |
| <b>control - UNM</b>     | -1.8932         | 0.165926                  | -11.4099       | 3.56E-10       |
| <b>LNA_AMP - LNA_SS</b>  | -0.28297        | 0.163221                  | -1.73366       | 0.513642       |
| <b>LNA_AMP - PNA_AMP</b> | -0.49543        | 0.163221                  | -3.03534       | 0.036107       |
| <b>LNA_AMP - PNA_SS</b>  | -0.69187        | 0.163221                  | -4.23885       | 0.000765       |
| <b>LNA_AMP - UNM</b>     | -1.4204         | 0.165926                  | -8.56042       | 3.61E-10       |
| <b>LNA_SS - PNA_AMP</b>  | -0.21246        | 0.163221                  | -1.30168       | 0.783363       |
| <b>LNA_SS - PNA_SS</b>   | -0.4089         | 0.163221                  | -2.50518       | 0.133795       |
| <b>LNA_SS - UNM</b>      | -1.13743        | 0.165926                  | -6.85502       | 1.44E-08       |
| <b>PNA_AMP - PNA_SS</b>  | -0.19644        | 0.163221                  | -1.2035        | 0.834043       |
| <b>PNA_AMP - UNM</b>     | -0.92496        | 0.165926                  | -5.57456       | 3.94E-06       |
| <b>PNA_SS - UNM</b>      | -0.72853        | 0.165926                  | -4.39068       | 0.000439       |

**Table S4.** Significance of Faith's phylogenetic diversity.

| <b>Contrast</b>          | <b>Estimate</b> | <b>Standard<br/>Error</b> | <b>t-value</b> | <b>p-value</b> |
|--------------------------|-----------------|---------------------------|----------------|----------------|
| <b>control - LNA_AMP</b> | -1.29551        | 0.207578                  | -6.2411        | 2.21E-07       |
| <b>control - LNA_SS</b>  | -1.67406        | 0.207578                  | -8.06474       | 4.07E-10       |
| <b>control - PNA_AMP</b> | -2.00497        | 0.207578                  | -9.65887       | 3.56E-10       |
| <b>control - PNA_SS</b>  | -2.30394        | 0.207578                  | -11.0992       | 3.56E-10       |
| <b>control - UNM</b>     | 0.348529        | 0.211019                  | 1.651644       | 0.567053       |
| <b>LNA_AMP - LNA_SS</b>  | -0.37855        | 0.207578                  | -1.82364       | 0.456171       |
| <b>LNA_AMP - PNA_AMP</b> | -0.70945        | 0.207578                  | -3.41776       | 0.011942       |
| <b>LNA_AMP - PNA_SS</b>  | -1.00843        | 0.207578                  | -4.85808       | 7.36E-05       |
| <b>LNA_AMP - UNM</b>     | 1.644043        | 0.211019                  | 7.790965       | 5.41E-10       |
| <b>LNA_SS - PNA_AMP</b>  | -0.3309         | 0.207578                  | -1.59412       | 0.604588       |
| <b>LNA_SS - PNA_SS</b>   | -0.62988        | 0.207578                  | -3.03444       | 0.036196       |
| <b>LNA_SS - UNM</b>      | 2.02259         | 0.211019                  | 9.584864       | 3.56E-10       |
| <b>PNA_AMP - PNA_SS</b>  | -0.29898        | 0.207578                  | -1.44031       | 0.70246        |
| <b>PNA_AMP - UNM</b>     | 2.353495        | 0.211019                  | 11.15299       | 3.56E-10       |
| <b>PNA_SS - UNM</b>      | 2.652472        | 0.211019                  | 12.56981       | 3.56E-10       |



**Table S5.** Significance of observed ASVs.

| Contrast          | Estimate | Standard<br>Error | t-value  | p-value  |
|-------------------|----------|-------------------|----------|----------|
| control - LNA_AMP | -0.35771 | 0.124878          | -2.86449 | 0.056764 |
| control - LNA_SS  | -0.65776 | 0.124878          | -5.26724 | 1.42E-05 |
| control - PNA_AMP | -0.43484 | 0.124878          | -3.48208 | 0.009797 |
| control - PNA_SS  | -0.69337 | 0.124878          | -5.55236 | 4.33E-06 |
| control - UNM     | -0.58827 | 0.126945          | -4.63406 | 0.000176 |
| LNA_AMP - LNA_SS  | -0.30005 | 0.124878          | -2.40274 | 0.166612 |
| LNA_AMP - PNA_AMP | -0.07712 | 0.124878          | -0.61759 | 0.989474 |
| LNA_AMP - PNA_SS  | -0.33566 | 0.124878          | -2.68786 | 0.087966 |
| LNA_AMP - UNM     | -0.23056 | 0.126945          | -1.81622 | 0.460841 |
| LNA_SS - PNA_AMP  | 0.222927 | 0.124878          | 1.785156 | 0.480541 |
| LNA_SS - PNA_SS   | -0.03561 | 0.124878          | -0.28512 | 0.999738 |
| LNA_SS - UNM      | 0.069489 | 0.126945          | 0.547394 | 0.993967 |
| PNA_AMP - PNA_SS  | -0.25853 | 0.124878          | -2.07028 | 0.312376 |
| PNA_AMP - UNM     | -0.15344 | 0.126945          | -1.20869 | 0.831528 |
| PNA_SS - UNM      | 0.105095 | 0.126945          | 0.827871 | 0.961572 |

**Table S7.** The proportion of the unclassified eukaryotic reads to all eukaryotic reads.

| Tick ID        | Control | LNA-<br>AMPure | LNA-<br>SizeSelect | PNA-<br>AMPure | PNA-<br>SizeSelect | UNM   |
|----------------|---------|----------------|--------------------|----------------|--------------------|-------|
| 66             | 0.01%   | 0.01%          | 0.02%              | 0.50%          | 0.95%              | 0.00% |
| 210            | 0.00%   | 0.04%          | 0.08%              | 1.30%          | 1.51%              | 0.00% |
| 258            | 0.02%   | 0.07%          | 0.12%              | 1.38%          | 2.00%              | 0.00% |
| 467            | 0.26%   | 0.34%          | 0.75%              | 1.47%          | 1.16%              | 0.00% |
| 932            | 0.02%   | 0.10%          | 0.19%              | 0.75%          | 1.64%              | 0.00% |
| 933            | 0.03%   | 0.11%          | 0.17%              | 1.48%          | 3.60%              | 0.00% |
| 2592           | 0.19%   | 2.55%          | 4.13%              | 3.22%          | 6.92%              | 0.64% |
| 2874           | 0.02%   | 0.74%          | 1.35%              | 1.03%          | 1.68%              | 0.03% |
| 2876           | 0.05%   | 0.95%          | 2.24%              | 2.52%          | 4.85%              | 0.00% |
| 3148           | 0.26%   | 5.48%          | 9.01%              | 5.12%          | 9.84%              | 0.00% |
| 3149           | 0.29%   | 5.52%          | 8.07%              | 5.75%          | 9.53%              | 0.00% |
| 3332           | 0.02%   | 1.19%          | 1.79%              | 6.00%          | 8.00%              | 0.00% |
| 3611           | 0.00%   | 0.37%          | 1.35%              | 1.53%          | 2.65%              | 0.00% |
| 3620           | 0.02%   | 2.31%          | 4.11%              | 9.50%          | 13.27%             | 0.00% |
| 3631           | 0.05%   | 1.68%          | 3.05%              | 2.36%          | 4.98%              | 0.00% |
| 3643           | 0.03%   | 1.35%          | 3.07%              | 7.13%          | 11.42%             | 0.01% |
| 3648           | 0.03%   | 2.12%          | 3.10%              | 3.30%          | 5.27%              | 0.00% |
| <b>Average</b> | 0.08%   | 1.47%          | 2.51%              | 3.20%          | 5.25%              | 0.04% |
| <b>Median</b>  | 0.03%   | 0.95%          | 1.79%              | 2.36%          | 4.85%              | 0.00% |
| <b>Min</b>     | 0.00%   | 0.01%          | 0.02%              | 0.50%          | 0.95%              | 0.00% |
| <b>Max</b>     | 0.29%   | 5.52%          | 9.01%              | 9.50%          | 13.27%             | 0.64% |
